# Supplementary material for: Longitudinal Analysis of COVID-19 Patients Shows Age-Associated T Cell Changes Independent of Ongoing Ill-Health
Source: PubMed Central journal article supplement (PMC8138306; doi:10.3389/fimmu.2021.676932), 2021-05-07
Supplement: DataSheet_1.pdf [file DataSheet_1.pdf]

**Supplemental Figure 1: Flow cytometry gating strategy.**

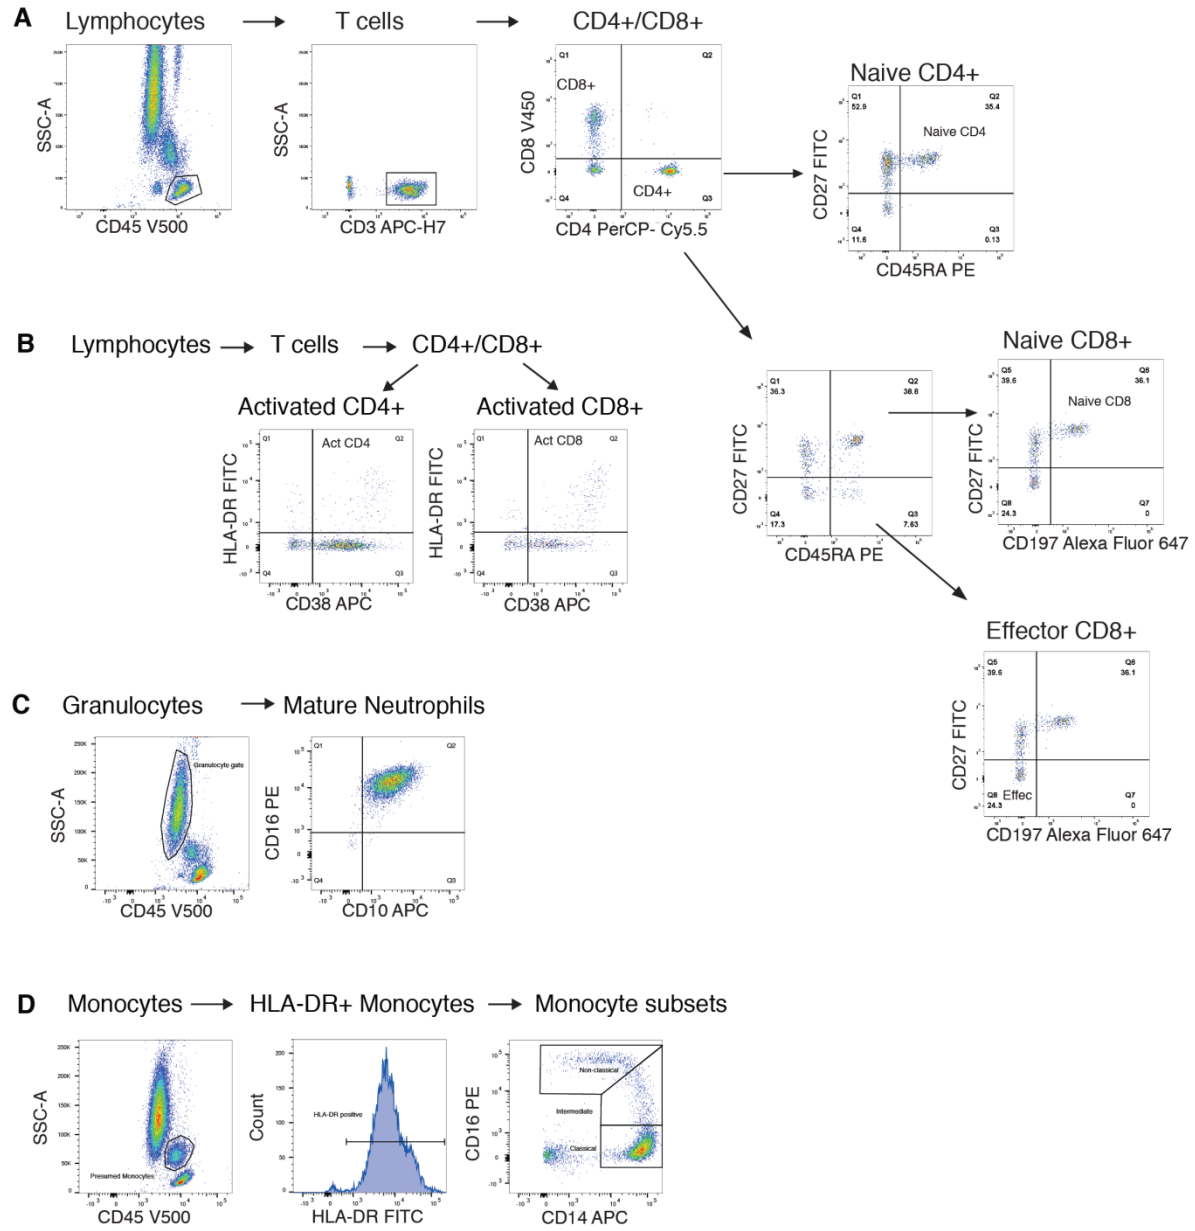

**Supplemental Figure 1: Gating strategy for flow cytometry shown (A) naïve and effector T lymphocytes (B) activated T lymphocytes (C) neutrophils (D) monocytes**

**Supplemental Figure 2: Patient enrolment diagram**

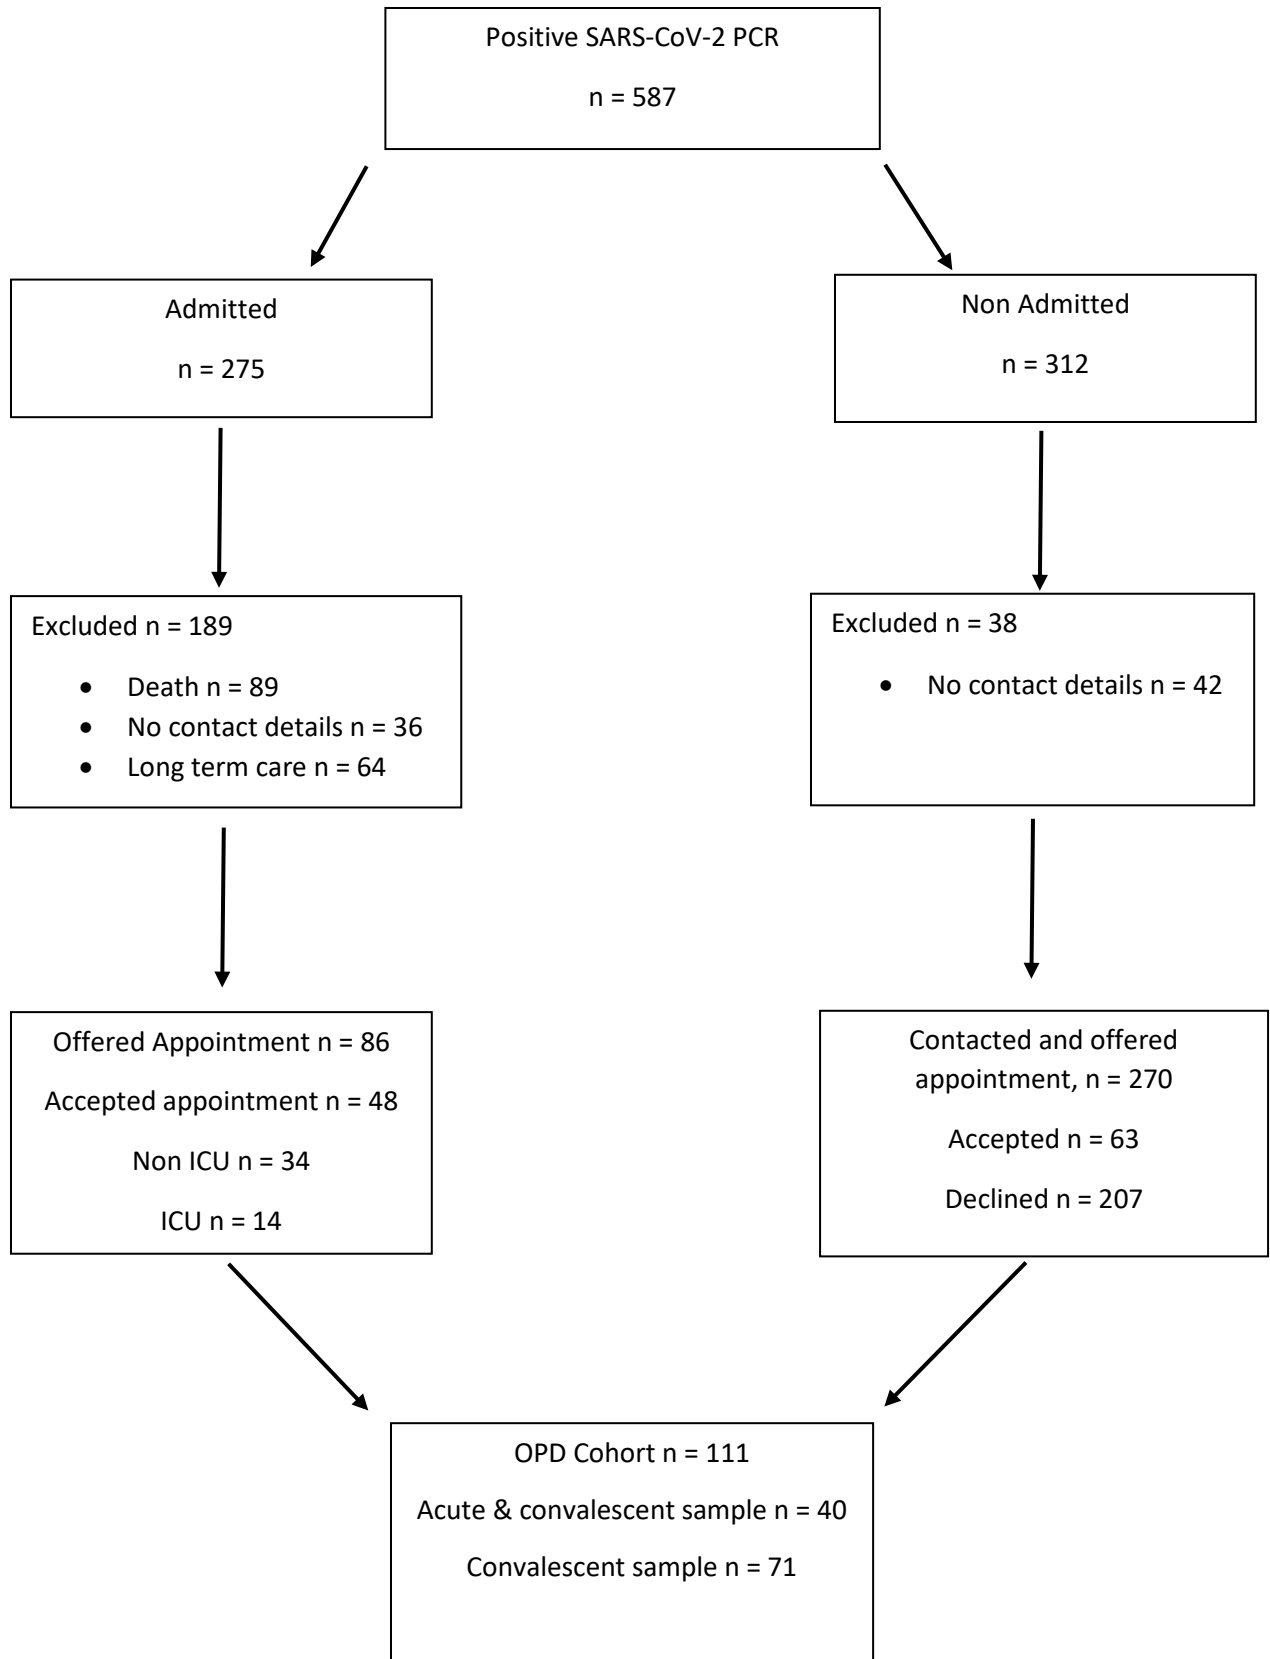

**Supplemental Figure 3: Lymphoid subsets in the matched cohort at 68 days post-infection versus controls, stratified by need for admission during acute infection**

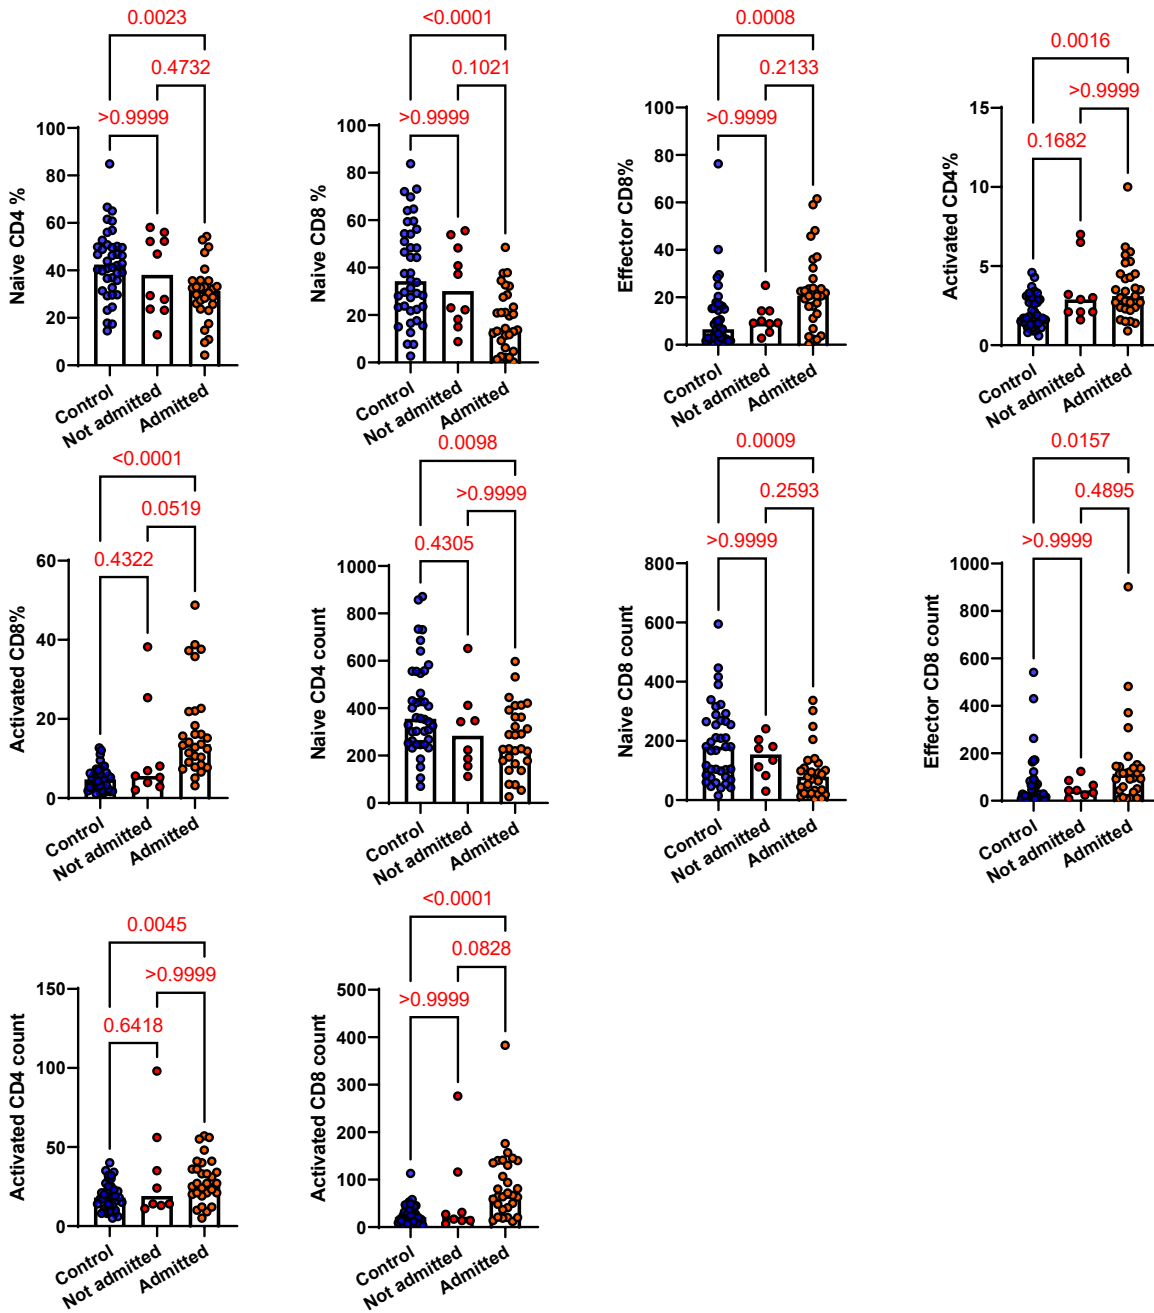

**Supplemental Figure 3:** Lymphocyte subpopulations in n=40 convalescent COVID patients, divided by need for admission during acute infection, in comparison to n=40 controls. Proportions and absolute counts of cell populations shown. Kruskal-Wallis test with Dunn’s multiple comparison post-hoc test used to determine between-group differences.

## Supplemental Figure 4: Recovery of B and NK cells

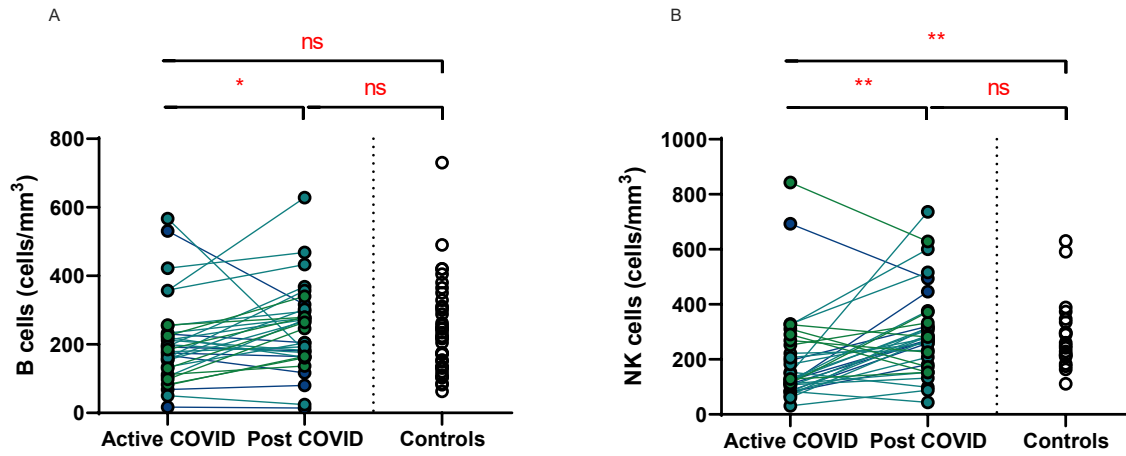

**Supplemental Figure 5: Major lymphoid populations in convalescent COVID-19.**

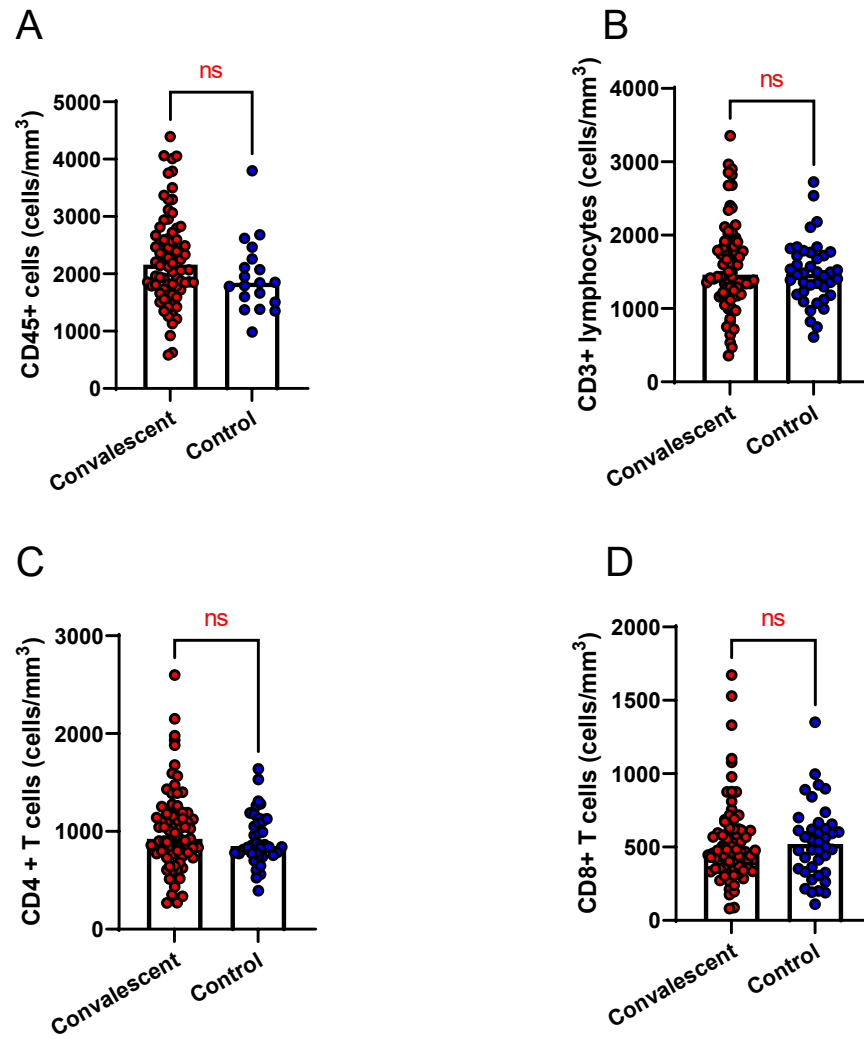

**Supplemental Figure 5:** Major lymphoid populations in n=71 convalescent COVID patients in comparison to n=40 controls **(A)** CD45+ cells **(B)** CD3+ lymphocytes **(C)** CD4+ T cells **(D)** CD8+ T cells. Wilcoxon rank-sum test ns=not significant

**Supplemental Figure 6: Lymphoid subsets at convalescence, stratified by need for admission during acute infection**

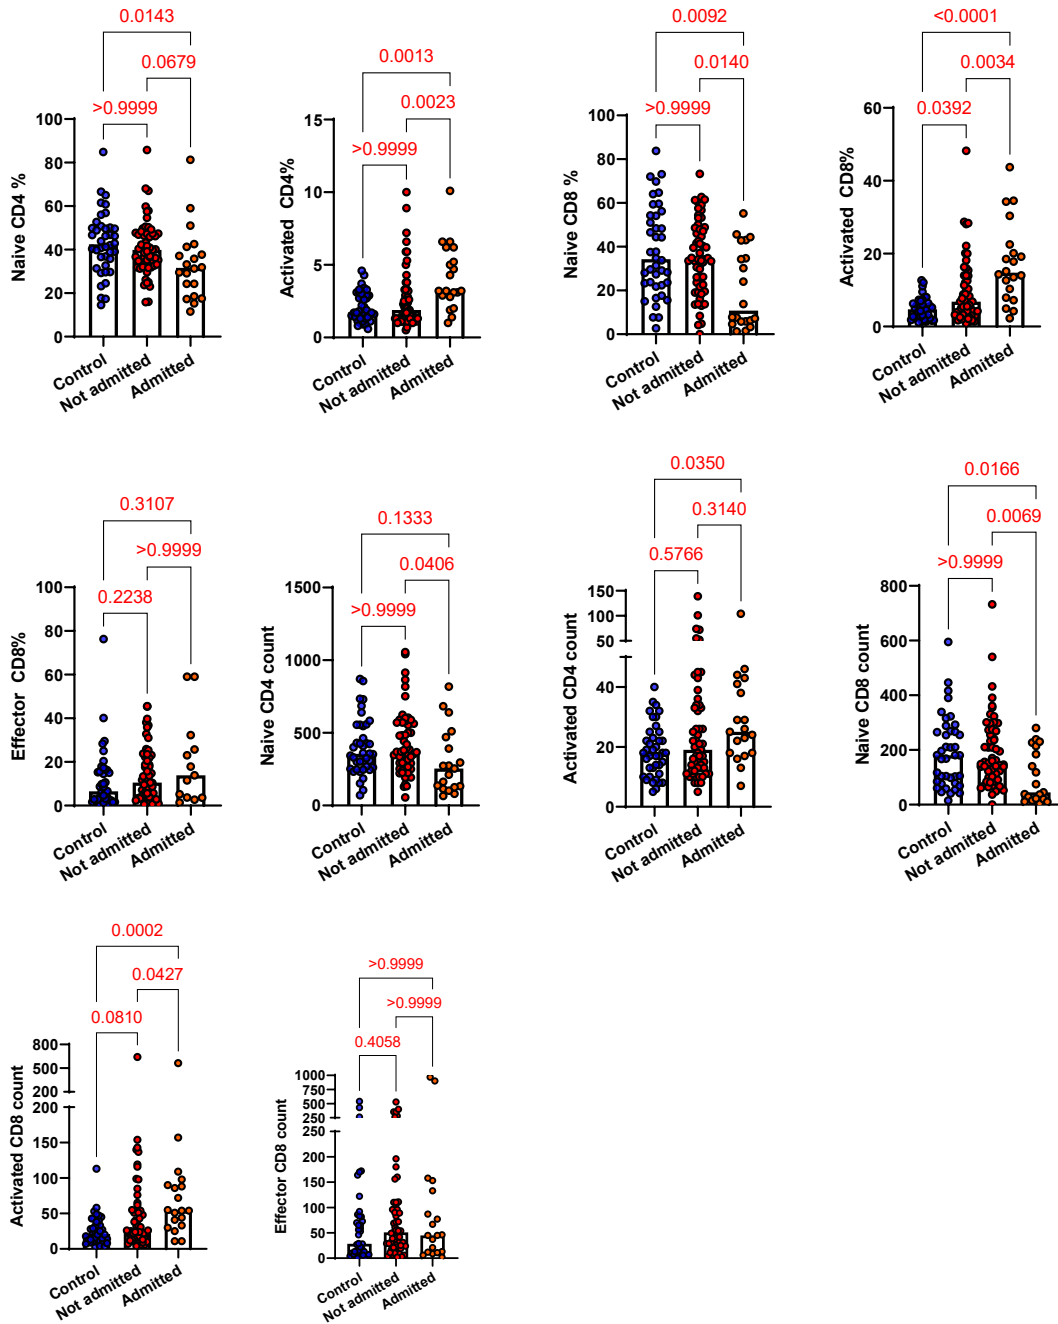

**Supplemental Figure 6:** Lymphocyte subpopulations in n=71 convalescent COVID patients, divided by need for admission during acute infection, in comparison to n=40 controls. Proportions and absolute counts of cell populations shown. Kruskal-Wallis test with Dunn's multiple comparison post-hoc test used to determine between-group differences.

**Supplemental Figure 7: Monocyte subpopulations in convalescent COVID-19.**

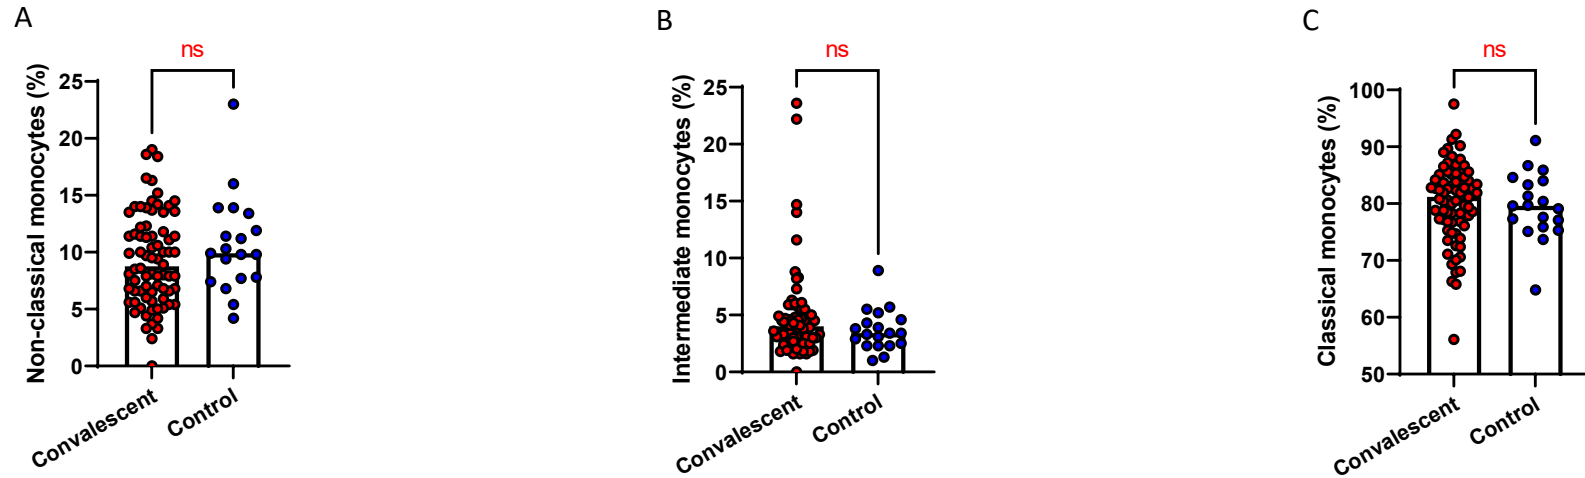

**Supplemental Figure 7:** Monocyte subpopulations in n=71 convalescent COVID patients in comparison to n=20 controls **(A)** non-classical monocytes **(B)** intermediate monocytes **(C)** classical monocytes. Wilcoxon rank-sum test. ns=not significant

**Supplemental Figure 8: Age-associated changes in convalescent lymphocyte subsets**

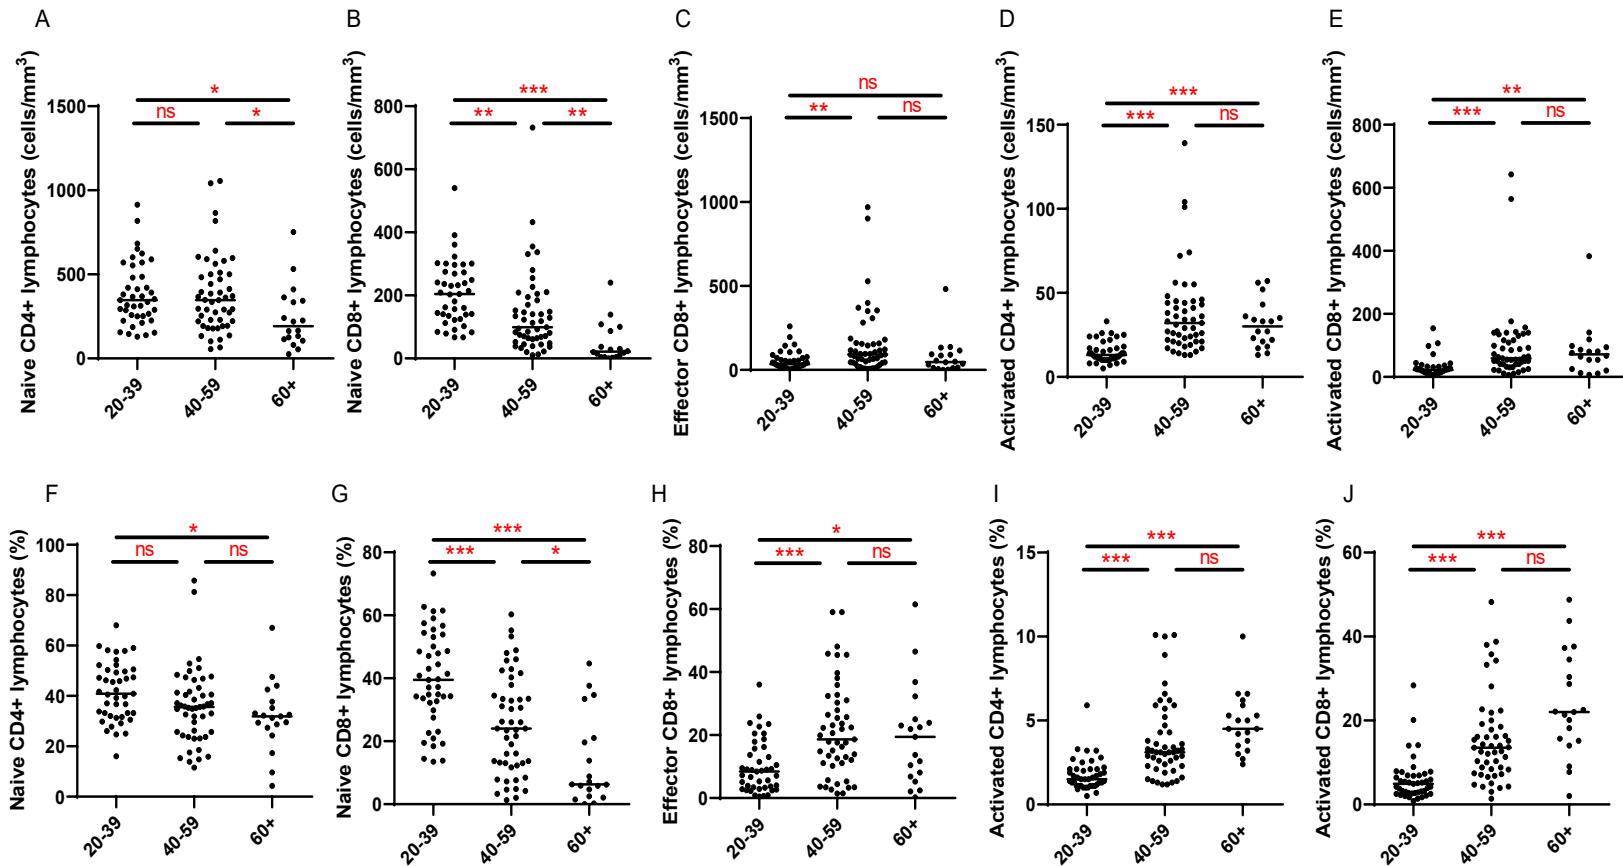

**Supplemental Figure 8:** Lymphocyte immunophenotyping of convalescent COVID patients (n=111) broken down by age. **(A)** naïve CD4+ T cell count **(B)** naïve CD8+ T cell count **(C)** effector CD8+ T cell count **(D)** activated CD4+ T cell count **(E)** activated CD8+ T cell count **(F)** naïve CD4+ T cell proportion **(G)** naïve CD8+ T cell proportion **(H)** effector CD8+ T cell proportion **(I)** activated CD4+ T cell proportion **(J)** activated CD8+ T cell proportion. Kruskal-Wallis test with post-hoc Dunn test. \* p < 0.05, \*\* p < 0.01, \*\*\* p < 0.001, ns = Not Significant



**Supplemental Figure 9: Age-associated changes in convalescent lymphocyte subset proportions versus age-matched controls**

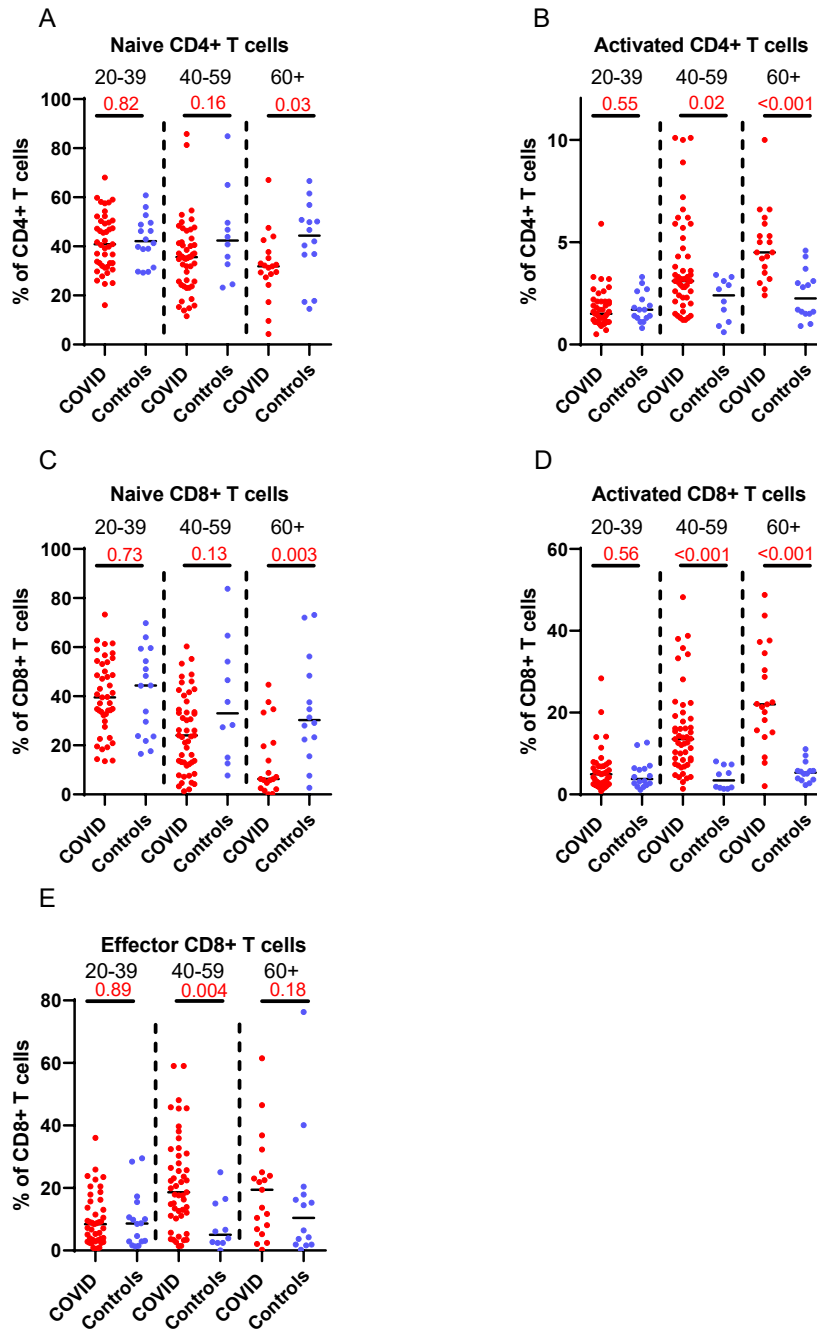

**Supplemental Figure 9:** Lymphocyte immunophenotyping of convalescent COVID patients (n=111) broken down by age with age-matched controls, showing proportions of naïve (A) and activated (B) CD4+ T cells, and naïve (C), activated (D) and effector (E) CD8+ T cells. Differences assessed by Wilcoxon rank-sum test. Bonferroni correction, significance  $p < 0.02$

## Supplemental Figure 10: Relationships of monocyte subsets with physical health measures

### A. Non-classical monocytes

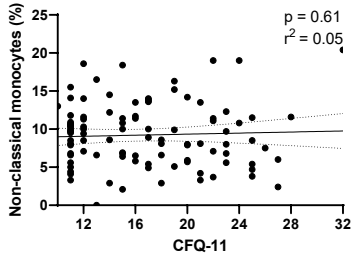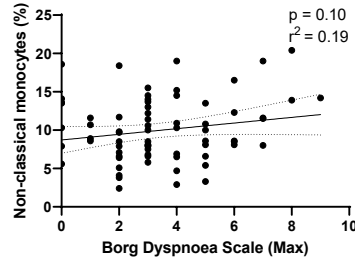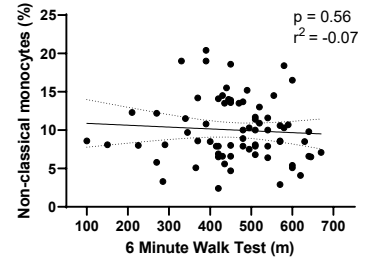

### B. Intermediate monocytes

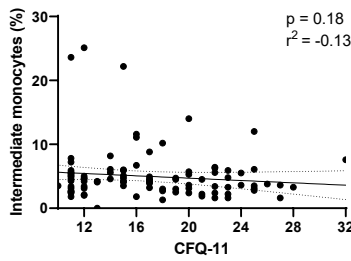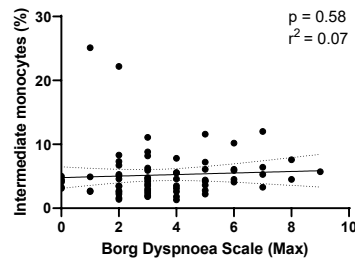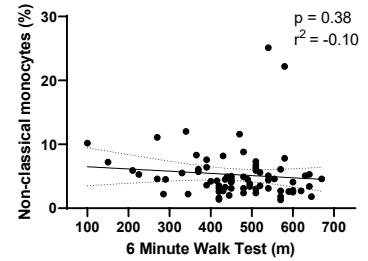

### C. Classical monocytes

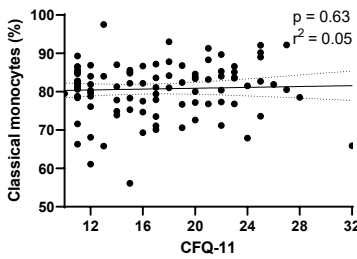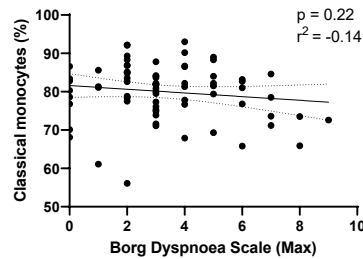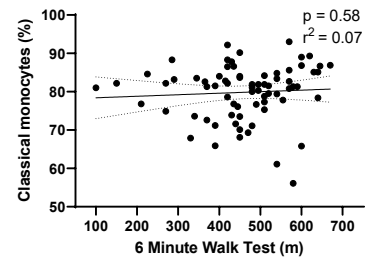

**Supplemental Figure 10:** Relationship with fatigue, perceived exertion and 6MWT distance in n=101 convalescent COVID patients with (A) non-classical monocytes (B) intermediate monocytes (C) classical monocytes. Correlation assessed with Pearson's chi-squared test. CFQ-11 = Chalder Fatigue Questionnaire-11

**Supplemental Table 1: Flow cytometry antibodies**

| Antibody | Fluorophore     | Clone  | Company        | Catalogue # |
|----------|-----------------|--------|----------------|-------------|
| CD45     | V500-C          | 2D1    | BD Biosciences | 655873      |
| CD8      | V450            | RPA-T8 | BD Biosciences | 560347      |
| CD3      | APC-H7          | SK7    | BD Biosciences | 641415      |
| CD4      | PerCP/CY5.5     | Sk3    | BD Biosciences | 332772      |
| CD45RA   | PE              | -      | BD Biosciences | 556627      |
| CD27     | FITC            | -      | BD Biosciences | 555440      |
| CD197    | Alexa Fluor 647 | 150503 | BD Biosciences | 560816      |
| HLA DR   | FITC            | L243   | BD Biosciences | 347400      |
| CD38     | APC             | HB-7   | BD Biosciences | 345807      |
| CD14     | APC             | MΦP9   | BD Biosciences | 345787      |
| CD16     | PE              | B73.1  | BD Biosciences | 332779      |
| CD10     | APC             | HI10a  | BD Biosciences | 332777      |
